# Supplementary material for: The Visual and Quantitative Study of the Microoccurrence of Irreducible Water at the Pore and Throat System in a Low-Permeability Sandstone Reservoir by Using Microcomputerized Tomography
Source: Hindawi journal article supplement (doi:10.1155/2018/6062475), 2018-08-06
Supplement: f1 [file 6062475.f1.pdf]

## Supplementary materials

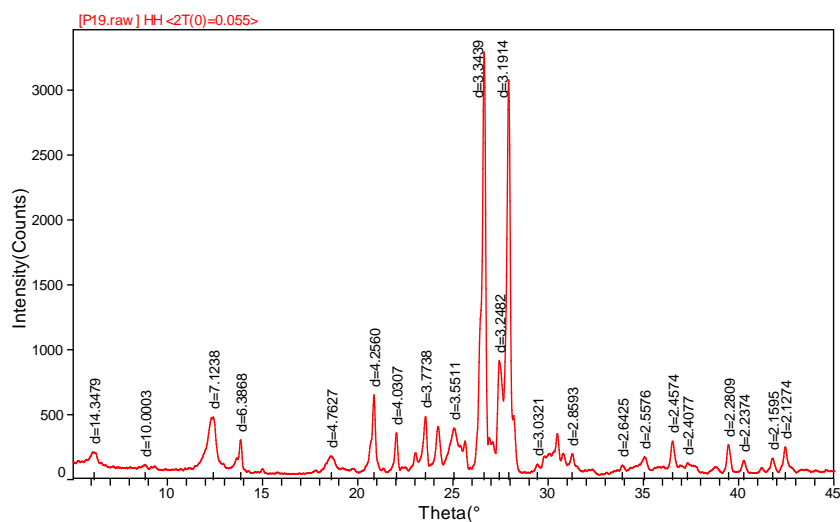

**Fig. S1.** XRD diffraction pattern of the experimental core sample.

Note: The core sample constitutes quartz, plagioclase, potash, feldspar, calcite, illite, and chlotite (oil-wetting clay) in corresponding proportion of 18.6%, 50.5%, 17.6%, 0.3%, 1.0%, and 17.5%.
